# Supplementary material for: Between-Habitat Variation of Benthic Cover, Reef Fish Assemblage and Feeding Pressure on the Benthos at the Only Atoll in South Atlantic: Rocas Atoll, NE Brazil
Source: PubMed Central journal article supplement (PMC4464550; doi:10.1371/journal.pone.0127176), 2015-06-10
Supplement: pone.0127176.s001.pdf [file pone.0127176.s001.pdf]

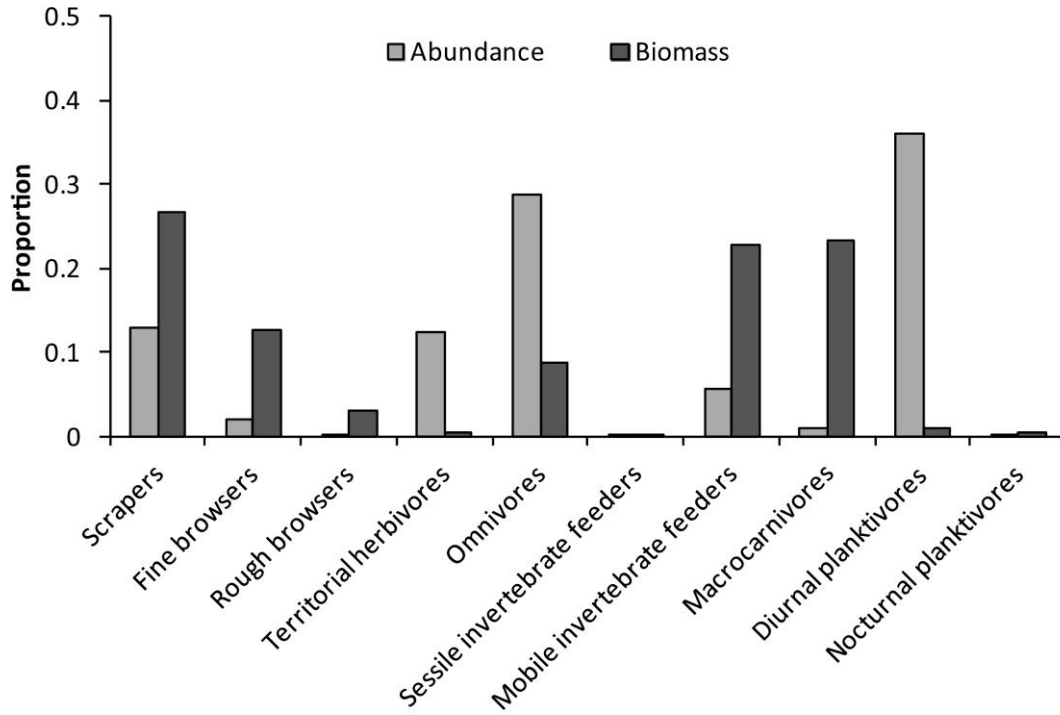

**S1 Fig.** Proportion of abundance and biomass for each reef fish functional group pooling the four studied habitats in Rocas Atoll, Brazil.
