# Supplementary material for: Between-Habitat Variation of Benthic Cover, Reef Fish Assemblage and Feeding Pressure on the Benthos at the Only Atoll in South Atlantic: Rocas Atoll, NE Brazil
Source: PubMed Central journal article supplement (PMC4464550; doi:10.1371/journal.pone.0127176), 2015-06-10
Supplement: pone.0127176.s002.pdf [file pone.0127176.s002.pdf]

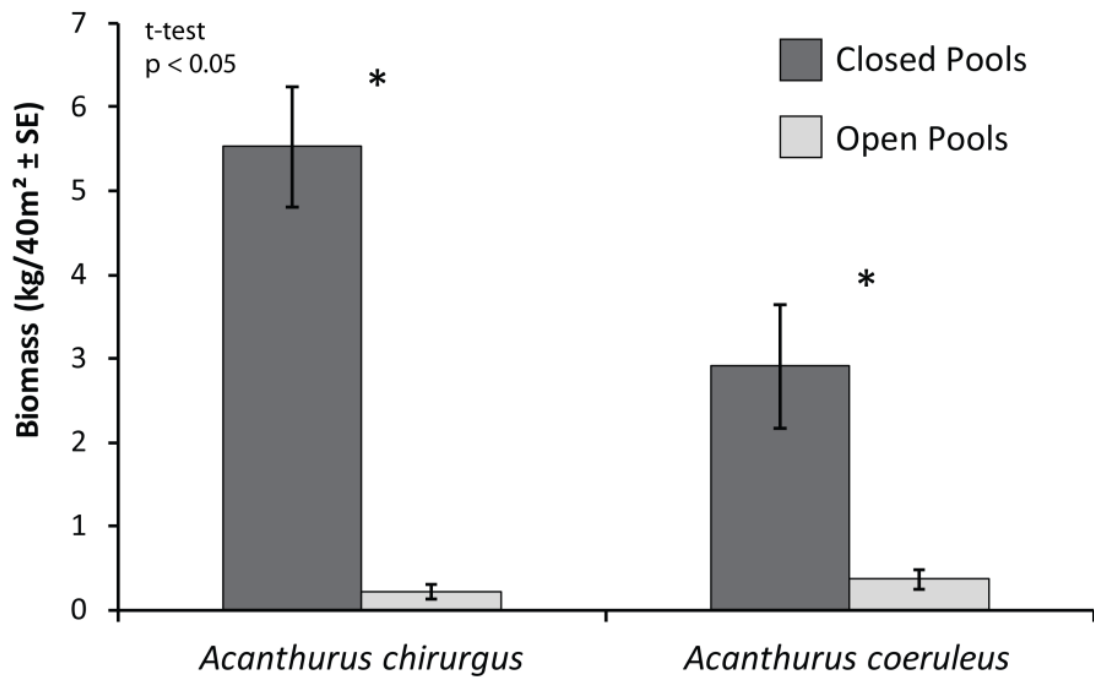

**S2 Fig.** Biomass of the two most abundant herbivorous fishes in the Atoll, *Acanthurus chirurgus* and *A. coeruleus*, between closed and open pools. (\*) indicate significant differences in the means between habitats ( t-test for *A. chirurgus*:  $t=7.02$ ,  $p<0.001$ ; t-test for *A. coeruleus*:  $t= 2.16$ ,  $p<0.05$ ). Error bars represent standard error of the mean.
