# Supplementary material for: Between-Habitat Variation of Benthic Cover, Reef Fish Assemblage and Feeding Pressure on the Benthos at the Only Atoll in South Atlantic: Rocas Atoll, NE Brazil
Source: PubMed Central journal article supplement (PMC4464550; doi:10.1371/journal.pone.0127176), 2015-06-10
Supplement: pone.0127176.s003.pdf [file pone.0127176.s003.pdf]

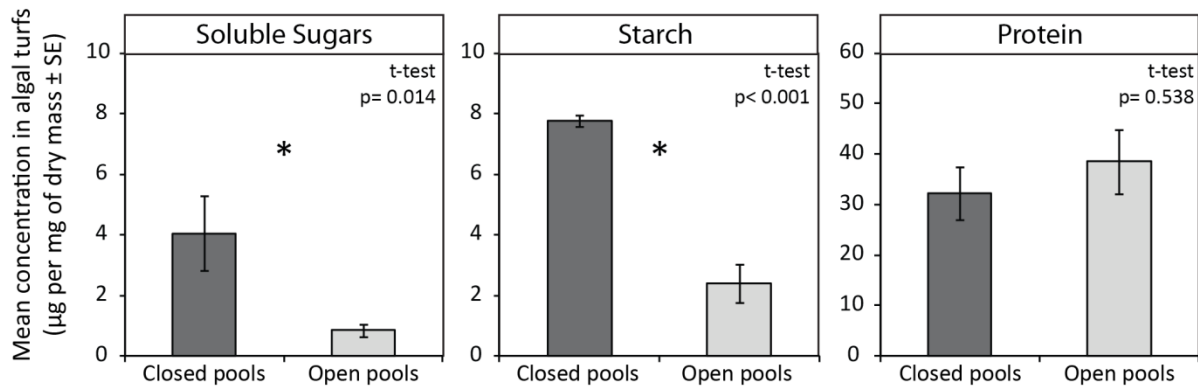

**S3 Fig.** Mean concentration of soluble sugars, starch and protein in algal turfs of closed and open pools. (\*) indicate significant differences (t-tests; Sugars,  $t = -2.89$ ,  $p = 0.014$ ; Starch,  $t = -7.476$ ,  $p < 0.001$ ; Proteins,  $t = 0.628$ ,  $p = 0.538$ ). Error bars represent standard error of the mean.
