# Supplementary material for: Between-Habitat Variation of Benthic Cover, Reef Fish Assemblage and Feeding Pressure on the Benthos at the Only Atoll in South Atlantic: Rocas Atoll, NE Brazil
Source: PubMed Central journal article supplement (PMC4464550; doi:10.1371/journal.pone.0127176), 2015-06-10
Supplement: pone.0127176.s004.pdf [file pone.0127176.s004.pdf]

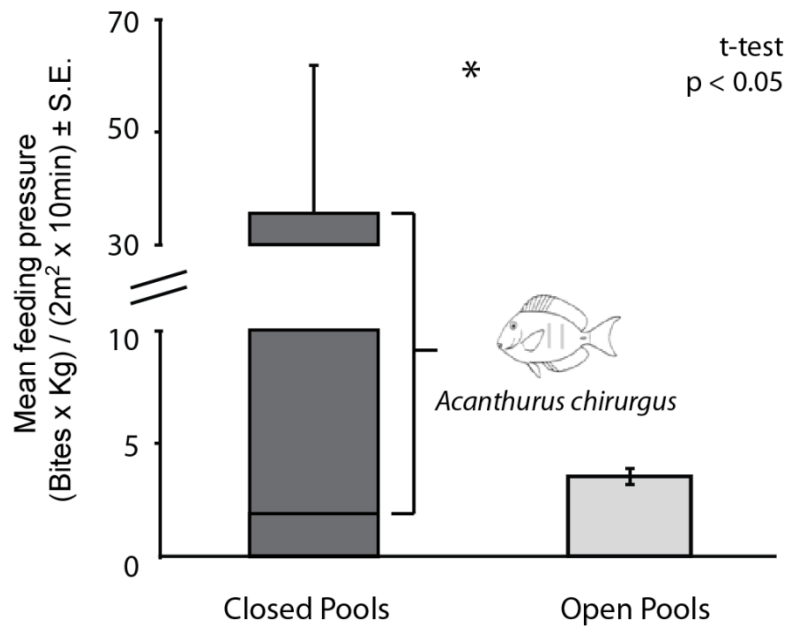

**S4 Fig.** Mean total reef fish feeding pressure on the benthos in closed and open pools. (\*) indicate significant differences in the mean feeding pressure between these two habitats (t-test;  $t = 2.19$ ,  $p = 0.03$ ). ( ) indicate the contribution of the species *Acanthurus chirurgus* (90% from the total). Error bars represent standard error of the mean.
